# Supplementary material for: METTL3 drives heart failure by regulating Spp1 and Fos m6A modification in myocardial infarction
Source: Research Square preprint supplement (doi:10.21203/rs.3.rs-4207910/v1), 2024-05-03
Supplement: Supplementary file 1 [file Supplementary Table1.xlsx]

## Sheet: Sheet1
group	Control	39	STEMI	39	p
male	27	0.692	33	0.846	0.107
dm	10	0.256	22	0.564	0.006
htn	22	0.564	28	0.718	0.157
dyslipidemia	14	0.359	20	0.513	0.171
smoking	24	0.615	24	0.615	1
drinking	1	0.026	8	0.205	0.029
family	0	0	1	0.026	0.314
MI	1	0.026	1	0.026	1
PCI	13	0.333	4	0.103	0.014
CABG	0	0	1	0.026	1
Stroke	2	0.051	8	0.205	0.087
AF	0	0	2	0.051	0.494
statin	34	0.895	7	0.184	0.001
SGLT2I	2	0.051	6	0.154	0.263
ARB/ACEI/ARNI	16	0.41	15	0.385	0.817
multi	22	0.564	32	0.821	0.026
CTO	4	0.103	8	0.205	0.209
age	68	62-71	66.5	61-73	0.745
BMI	25.4	23.5-26.6	26	25.1-26.6	0.787
WBC	6.72	4.74-6.96	9.1	7.85-11.81	0.001
TG	1.27	1.0-2.46	1.6	0.73-1.90	0.079
TC	4.31	3.27-4.48	4.09	3.70-4.95	0.048
LDL	2.26	1.51-2.58	2.54	1.92-2.93	0.002
HDL	1.01	0.97-1.15	0.97	0.81-1.14	0.395
lpa	23	9.0-54	23	11.3-94	0.398
HBA1c	6.2	5.9-6.5	6.8	5.8-7.9	0.005
cTnT	0.01	0.01-0.01	1.38	0.22-3.16	<0.001
BNP	55	48-226	1071	591-2874	<0.001
Cr	70	64-80	81.5	72-101	0.589
CRP	13.2	10.0-31	14.8	8.1-34.2	0.677
EF	64	60-68	54	50-60	<0.001
