# Supplementary material for: METTL3 drives heart failure by regulating Spp1 and Fos m6A modification in myocardial infarction
Source: Research Square preprint supplement (doi:10.21203/rs.3.rs-4207910/v1), 2024-05-03
Supplement: Supplementary file 5 [file Supplementary Table2.xlsx]

## Sheet: Sheet1
pcDNA3.1(+)-METTL3-3xFlag	METTL3-HF	TAAGCTTGCCACCATGTCGGACACGTGGAGCTCTATC
	METTL3-XR	CTCTAGATAAATTCTTAGGTTTAGAGATGATACCATCTGGGTACC
pcDNA3.1(+)-METTL3(	METTL3-70HF	TAAGCTTGCCACCATGGAATTAGCTACAGATCCTGAGTTAGAGAAGAAGTTG
1-70)-3xFlag	METTL3-XR	CTCTAGATAAATTCTTAGGTTTAGAGATGATACCATCTGGGTACC
pcDNA3.1(+)-METTL3(	METTL3-198R	CCAGATCAACATCACCAGAGACTAACGAACTGGCAAAG
198-219)-3xFlag	METTL3-198F	GTTAGTCTCTGGTGATGTTGATCTGGAGATAGAGAGCCTTC
	METTL3-HF	TAAGCTTGCCACCATGTCGGACACGTGGAGCTCTATC
	METTL3-XR	CTCTAGATAAATTCTTAGGTTTAGAGATGATACCATCTGGGTACC
pcDNA3.1(+)-METTL3(	METTL3-210R	GGCAGCATGTGGCTCCTTTGCTGGTTCCGATG
210-215)-3xFlag	METTL3-210F	CAAAGGAGCCACATGCTGCCTCAGATGTTGATCTGG
	METTL3-HF	TAAGCTTGCCACCATGTCGGACACGTGGAGCTCTATC
	METTL3-XR	CTCTAGATAAATTCTTAGGTTTAGAGATGATACCATCTGGGTACC
pcDNA3.1(+)-METTL3(	METTL3-377R	GTCCAGGTAGCGACAACAGATCCACTGAGGTGGG
377-278)-3xFlag	METTL3-377F	GATCTGTTGTCGCTACCTGGACGTCAGTATCTTG
	METTL3-HF	TAAGCTTGCCACCATGTCGGACACGTGGAGCTCTATC
	METTL3-XR	CTCTAGATAAATTCTTAGGTTTAGAGATGATACCATCTGGGTACC
pcDNA3.1(+)-METTL3(	METTL3-396R	CATCTCATCATCGTCAGCCATCACAACTGCAAACTTG
396-410)-3xFlag	METTL3-396F	GTGATGGCTGACGATGATGAGATGCGCAGGCTC
	METTL3-HF	TAAGCTTGCCACCATGTCGGACACGTGGAGCTCTATC
	METTL3-XR	CTCTAGATAAATTCTTAGGTTTAGAGATGATACCATCTGGGTACC
pcDNA3.1(+)-METTL3(	METTL3-450R	CTTCACCCAAATAATATACCCCCAGAGGTTTAGACATTCTCTC
450-454)-3xFlag	METTL3-450F	CTCTGGGGGTATATTATTTGGGTGAAGACAAATCAACTGCAAC
	METTL3-HF	TAAGCTTGCCACCATGTCGGACACGTGGAGCTCTATC
	METTL3-XR	CTCTAGATAAATTCTTAGGTTTAGAGATGATACCATCTGGGTACC
pcDNA3.1(+)-METTL3(	METTL3-462R	CAGTGTTCCTTATTTGTCTTCACCCAAATAATTTCATCTACCCG
462-479)-3xFlag	METTL3-462F	GGGTGAAGACAAATAAGGAACACTGCTTGGTTGGTGTC
	METTL3-HF	TAAGCTTGCCACCATGTCGGACACGTGGAGCTCTATC
	METTL3-XR	CTCTAGATAAATTCTTAGGTTTAGAGATGATACCATCTGGGTACC
pcDNA3.1(+)-METTL3(	METTL3-464R	CAAGCAGTGTTCCAGTTGATTTGTCTTCACCCAAATAATTTCATCTAC
464-480)-3xFlag	METTL3-464F	GACAAATCAACTGGAACACTGCTTGGTTGGTGTCAAAG
	METTL3-HF	TAAGCTTGCCACCATGTCGGACACGTGGAGCTCTATC
	METTL3-XR	CTCTAGATAAATTCTTAGGTTTAGAGATGATACCATCTGGGTACC
pcDNA3.1(+)-METTL3(	METTL3-465R	GTTCCTTCCCTTGCAGTTGATTTGTCTTCACCCAAATAATTTC
465-478)-3xFlag	METTL3-465F	CAAATCAACTGCAAGGGAAGGAACACTGCTTGGTTGG
	METTL3-HF	TAAGCTTGCCACCATGTCGGACACGTGGAGCTCTATC
	METTL3-XR	CTCTAGATAAATTCTTAGGTTTAGAGATGATACCATCTGGGTACC
pcDNA3.1(+)-METTL3(	METTL3-507R	GCCATAGATTTCCTCAGCTACGATCACATCACAATCCAG
507-515)-3xFlag	METTL3-507F	GATCGTAGCTGAGGAAATCTATGGCATGATTGAAAGACTATCTCCTG
	METTL3-HF	TAAGCTTGCCACCATGTCGGACACGTGGAGCTCTATC
	METTL3-XR	CTCTAGATAAATTCTTAGGTTTAGAGATGATACCATCTGGGTACC
pcDNA3.1(+)-METTL3(	METTL3-536R1	GGGTGATCCAGTTGGGTTGCACTCCAAATAACTCAATCTTGCGAGTGCC
536-539)-3xFlag	METTL3-536BR	TGGATCCCATCCAGTTGGTTTCCAAGGGTGATCCAGTTGGGTTGCAC
	METTL3-549BR	GTGGATCCCATCCAGTCCAAGGGTGATCCAGTTGGGTTG
pcDNA3.1(+)-HuR-HA	HuR20-HF	TAAGCTTGCCACCATGTCTAATGGTTATGAAGACCACATGGCCGAAGACTGCAGG
	HuR-XhR	ACTAGAGTTTGTGGGACTTGTTGGTTTTGAAGGAAAC
pcDNA3.1(+)-HuR(	HuR20-F2	ACATGGCCGAAGACTGCAGGGGTGACATCGGGAGAAGCTCAGAGGTGATCAAAGACGCC
20-98)-HA	HuR20-HF	TAAGCTTGCCACCATGTCTAATGGTTATGAAGACCACATGGCCGAAGACTGCAGG
	HuR-XhR	ACTAGAGTTTGTGGGACTTGTTGGTTTTGAAGGAAAC
pcDNA3.1(+)-HuR(	HuR106-R	TTCTGGTTGGGGTCTTTGATCACCTCTGAGCTCGGG
106-186)-HA	HuR20-HF	TAAGCTTGCCACCATGTCTAATGGTTATGAAGACCACATGGCCGAAGACTGCAGG
	HuR-XhR	ACTAGAGTTTGTGGGACTTGTTGGTTTTGAAGGAAAC
	HuR106-F	GGTGATCAAAGACCCCAACCAGAACAAAAACGTGGC
pcDNA3.1(+)-HuR(	HuR244-XR	ACTCGAGTTTGTGGGACTTGCCGGAGGAGGCGTTTCC
244-322)-HA	HuR20-HF	TAAGCTTGCCACCATGTCTAATGGTTATGAAGACCACATGGCCGAAGACTGCAGG
