# Supplementary material for: METTL3 drives heart failure by regulating Spp1 and Fos m6A modification in myocardial infarction
Source: Research Square preprint supplement (doi:10.21203/rs.3.rs-4207910/v1), 2024-05-03
Supplement: Supplementary file 9 [file Supplementary Table3.xlsx]

## Sheet: Sheet1
premier	Forward	Reverse	species
SPP1	GACGATGATGACGACGACGATGAC	GTGTGCTGGCAGTGAAGGACTC	mouse
Postn	TTATCTGCTCTGCTGCTGCTGTTC	ACCCCTGATGCGGCTGTGAG	mouse
C3	GCTGCCAACCTCATCGCCATC	TGAATCACTGGTCCGTCCTCCTG	mouse
C4a	GCATCTGGCGGAACGGTAACC	GTAACGGTCAGAGAGGGAGGTCAG	mouse
Cfd	CTGGAGGCGGCTGTATGTGTTG	TCACTTGCACTGAAGCCATGTAGG	mouse
Msln	GGGAGGTTCTGAGGAGTGGAAGAG	CCTTAGGGATGCTGTGGACAATGG	mouse
Tnc	GATACAGTGGAACGGCAGGTGAC	GTGATGGCTGAGTCTGTGTCCTTG	mouse
Eln	GCCCTGGTGGTGTTACTGGTATTG	AGCCGCCTTAGCAGCAGATTTG	mouse
Lox	CCAGTTCAGCATATAGGGCGGATG	GGCGGCTTGGTAAGAAGTCAGAC	mouse
Ptgs2	AGGTCATCGGTGGAGAGGTGTATC	CGGCACCAGACCAAAGACTTCC	mouse
Thy1	AGCCTGACCCGAGAGAAGAAGAAG	CCTCATCCTTGGTGGTGAAGTTGG	mouse
C2	GTTACCGCTGTTCCTCCACGAATC	CTCCGACCCACTCCACACTCC	mouse
C6	CAGGAGAGCCCAGAGGAGATGTC	GCTGGAACTCGGTGTGGATTACTC	mouse
Col8a1	GTATGCCTGGAATGCCTGGGAAG	GGGTCCTGGAGGTCCTTGTGG	mouse
Col8a2	GCCTTGGATGAGACTGGTATTGCC	GGGAAGTGAGCACAGCGGTAAAG	mouse
Vcam1	GCTGCTGTTGGCTGTGACTCTC	GCTCAGCGTCAGTGTGGATGTAG	mouse
Col12a1	GAAACCAACAGAGGCTCCCACAG	ACTCCAAGAGGCATCCGTCAGG	mouse
Col4a6	TGGCTGTTCCTGGTTTCCTTATGC	CAGTGTGCCCTCTTGCTCCTTTC	mouse
FOS	AGACCATGTCAGGCGGCAGAG	GTCAGCTCCCTCCTCCGATTCC	mouse
Itga11	GGCAGTGCTGAAGGAGACAAGTG	CTAGGTATGCGGCGTGGTTCTTC	mouse
Mbp	CCGCCTCAGAAGACAGTGATGTG	TTTGGGTCTGCTGTGTGCTTGG	mouse
Myl7	AGCTGCATTGACCAGAACAGAGAC	GAGGAAGACGGTGAAGTTGATGGG	mouse
Nppa	GAGCGAGCAGACCGATGAAGC	TCCATCTCTCTGAGACGGGTTGAC	mouse
S100b	TGGTTGCCCTCATTGATGTCTTCC	TTGTCCACCACTTCCTGCTCTTTG	mouse
Sln	GAGCGGTCTACCCAGGAGCTG	GGACCTCACGAGGAGCCACATG	mouse
Thbs4	GACTCCTGTGACACCAACCAAGAC	TCATCGCATTCATCGCCAATCCC	mouse
Tnfrsf11b	TGTGTCCCTTGCCCTGACTACTC	CTCGGTTGTGGGTGCGGTTG	mouse
Atp1b4	AGCGGACGAAGAGGAGGAAGC	CATTGCCTGTTGACTGACCCTGAC	mouse
Car3	CTGCTGAGCTTCACCTGGTTCAC	ACTCGCCTTTCTCCCGTCCTATC	mouse
Mpz	AGGCTCTCAGGTGGTGGTCATC	GGCGTTCTTGAGGCTGGTTCTAC	mouse
Scd	TGTCAAAGAGAAGGGCGGAAAGC	CAGGATGAAGCACATGAGCAGGAG	mouse
Col1a1	TGTTGGTCCTGCTGGCAAGAATG	GTCACCTTGTTCGCCTGTCTCAC	mouse
ELAVL1	GCATCACCAGGCACAGAGATTCAG	CACCAGCCCGAGGAAGCATTG	mouse
Hnrnpa2b1	CCAGGACCAGGAAGCAACTTTAGG	CCTCCTCCATAACCAGGGCTACC	mouse
Fmr1	CGGAAGAGGACAAGGAGGAAGAGG	TCCCTTCACTGGAGGTGCTCTG	mouse
Igf2bp1	CCAAGACGGCAGACGAAGTTCC	AAGTTCCGCCCTTCCTTTCCAATG	mouse
RBM15b	AGGAGCCACCATCACCACCAC	GGTCCGATGATTGCGTTCACTCTC	mouse
RBM15	TGCTCTATGACCGGCCTCTGAAG	AAGCGATCTCTGACCTCCACCTC	mouse
METTL3	ATGTGCAGCCCAACTGGATT	CTGTGCTTAAACCGGGCAAC	mouse
METTL14	TGAGAGGCTTAGACCGAAGTCACC	GACCACGGCCAGCAGATGTTC	mouse
WTAP	AGAACATCCTTGTCATGCGGCTAG	TCGGCTGCTGAACTTGCTTGAG	mouse
YTHDF1	CTCTGTTGGAAGTGCTCAGCCTAC	GTACTTGATGGAGCGGTGGATGTC	mouse
YTHDF2	CAGACACAGCCATTGCCTCCAC	CCGCCTGAGACTGTCCTACTCC	mouse
YTHDF3	CAGCCTTGAGCAGCAGTGGTATG	AGGAGGTGGTGGCACAGCAG	mouse
ALKBH5	CGGAAGTACCAGGAGGACTCAGAC	GGATGCCGCTCTTCACCTTGC	mouse
IRF7	CCCTCAGCAGTGCCCTACCC	CCCAGCATCACCAGAAAGCAGAG	mouse
IFNB1	TTGCGTTCCTGCTGTGCTTCTC	TCCGTCCTGTAGCTGAGGTTGAG	mouse
TNF-α	ATGGGCTCCCTCTCATCAGTTCC	GCTCCTCCGCTTGGTGGTTTG	mouse
			mouse
IL-1b	CTCACAGCAGCATCTCGACAAGAG	TCCACGGGCAAGACATAGGTAGC	mouse
IL-6	ACTTCCAGCCAGTTGCCTTCTTG	TGGTCTGTTGTGGGTGGTATCCTC	mouse
IL-12b	CCTCAAGTTCTTCGTCCGCATCC	CATTGGACTTCGGCAGAGGTCTTC	mouse
Ccl5	GACACCACTCCCTGCTGCTTTG	CTCTGGGTTGGCACACACTTGG	mouse
Ccl3	GACTGCCTGCTGCTTCTCCTATG	GATCTGCCGGTTTCTCTTGGTCAG	mouse
